# Supplementary material for: Associations of weather and air pollution with objective physical activity and sedentary time before and after bariatric surgery: a secondary analysis of a prospective cohort study
Source: bioRxiv or medRxiv preprint supplement (doi:10.1101/2023.03.22.23287589), 2023-03-22
Supplement: Supplementary file [file media-1.pdf]

**Supplemental table 1: STROBE Statement—checklist of items that should be included in reports of observational studies**

|                           | <b>Item No</b> | <b>Recommendation</b>                                                                                                                                                                                                                                                                                                                                                                                                                                                          | <b>Page No</b> |
|---------------------------|----------------|--------------------------------------------------------------------------------------------------------------------------------------------------------------------------------------------------------------------------------------------------------------------------------------------------------------------------------------------------------------------------------------------------------------------------------------------------------------------------------|----------------|
| <b>Title and abstract</b> | 1              | (a) Indicate the study's design with a commonly used term in the title or the abstract                                                                                                                                                                                                                                                                                                                                                                                         | 4              |
|                           |                | (b) Provide in the abstract an informative and balanced summary of what was done and what was found                                                                                                                                                                                                                                                                                                                                                                            | 4              |
| <b>Introduction</b>       |                |                                                                                                                                                                                                                                                                                                                                                                                                                                                                                |                |
| Background/rationale      | 2              | Explain the scientific background and rationale for the investigation being reported                                                                                                                                                                                                                                                                                                                                                                                           | 5-7            |
| Objectives                | 3              | State specific objectives, including any prespecified hypotheses                                                                                                                                                                                                                                                                                                                                                                                                               | 7              |
| <b>Methods</b>            |                |                                                                                                                                                                                                                                                                                                                                                                                                                                                                                |                |
| Study design              | 4              | Present key elements of study design early in the paper                                                                                                                                                                                                                                                                                                                                                                                                                        | 8-9            |
| Setting                   | 5              | Describe the setting, locations, and relevant dates, including periods of recruitment, exposure, follow-up, and data collection                                                                                                                                                                                                                                                                                                                                                | 9              |
| Participants              | 6              | (a) <i>Cohort study</i> —Give the eligibility criteria, and the sources and methods of selection of participants. Describe methods of follow-up<br><br><i>Case-control study</i> —Give the eligibility criteria, and the sources and methods of case ascertainment and control selection. Give the rationale for the choice of cases and controls<br><br><i>Cross-sectional study</i> —Give the eligibility criteria, and the sources and methods of selection of participants | 8              |
|                           |                | (b) <i>Cohort study</i> —For matched studies, give matching criteria and number of exposed and unexposed<br><br><i>Case-control study</i> —For matched studies, give matching criteria and the number of controls per case                                                                                                                                                                                                                                                     |                |
| Variables                 | 7              | Clearly define all outcomes, exposures, predictors, potential confounders, and effect modifiers. Give diagnostic criteria, if applicable                                                                                                                                                                                                                                                                                                                                       | 9-10           |
| Data sources/measurement  | 8*             | For each variable of interest, give sources of data and details of methods of assessment (measurement). Describe comparability of assessment methods if there is more than one group                                                                                                                                                                                                                                                                                           | 9-10           |
| Bias                      | 9              | Describe any efforts to address potential sources of bias                                                                                                                                                                                                                                                                                                                                                                                                                      | 9-10           |
| Study size                | 10             | Explain how the study size was arrived at                                                                                                                                                                                                                                                                                                                                                                                                                                      | 8              |

|                        |    |                                                                                                                                                                                                                                                                                                                   |       |
|------------------------|----|-------------------------------------------------------------------------------------------------------------------------------------------------------------------------------------------------------------------------------------------------------------------------------------------------------------------|-------|
| Quantitative variables | 11 | Explain how quantitative variables were handled in the analyses. If applicable, describe which groupings were chosen and why                                                                                                                                                                                      | 9-10  |
| Statistical methods    | 12 | (a) Describe all statistical methods, including those used to control for confounding                                                                                                                                                                                                                             | 11,12 |
|                        |    | (b) Describe any methods used to examine subgroups and interactions                                                                                                                                                                                                                                               | 11,12 |
|                        |    | (c) Explain how missing data were addressed                                                                                                                                                                                                                                                                       | 11,12 |
|                        |    | (d) <i>Cohort study</i> —If applicable, explain how loss to follow-up was addressed<br><br><i>Case-control study</i> —If applicable, explain how matching of cases and controls was addressed<br><br><i>Cross-sectional study</i> —If applicable, describe analytical methods taking account of sampling strategy | 11,12 |
|                        |    | (e) Describe any sensitivity analyses                                                                                                                                                                                                                                                                             | 12    |

### Results

|                  |     |                                                                                                                                                                                                   |                     |
|------------------|-----|---------------------------------------------------------------------------------------------------------------------------------------------------------------------------------------------------|---------------------|
| Participants     | 13* | (a) Report numbers of individuals at each stage of study—eg numbers potentially eligible, examined for eligibility, confirmed eligible, included in the study, completing follow-up, and analysed | 8                   |
|                  |     | (b) Give reasons for non-participation at each stage                                                                                                                                              |                     |
|                  |     | (c) Consider use of a flow diagram                                                                                                                                                                | Suppl<br>Fig<br>1   |
| Descriptive data | 14* | (a) Give characteristics of study participants (eg demographic, clinical, social) and information on exposures and potential confounders                                                          | Suppl<br>Table<br>1 |
|                  |     | (b) Indicate number of participants with missing data for each variable of interest                                                                                                               | 8,<br>Flow<br>diag  |
|                  |     | (c) <i>Cohort study</i> —Summarise follow-up time (eg, average and total amount)                                                                                                                  |                     |
| Outcome data     | 15* | <i>Cohort study</i> —Report numbers of outcome events or summary measures over time                                                                                                               | 8                   |
|                  |     | <i>Case-control study</i> —Report numbers in each exposure category, or summary measures of exposure                                                                                              |                     |

|                          |    |                                                                                                                                                                                                              |       |
|--------------------------|----|--------------------------------------------------------------------------------------------------------------------------------------------------------------------------------------------------------------|-------|
|                          |    | <i>Cross-sectional study</i> —Report numbers of outcome events or summary measures                                                                                                                           |       |
| Main results             | 16 | (a) Give unadjusted estimates and, if applicable, confounder-adjusted estimates and their precision (eg, 95% confidence interval). Make clear which confounders were adjusted for and why they were included | 12-14 |
|                          |    | (b) Report category boundaries when continuous variables were categorized                                                                                                                                    |       |
|                          |    | (c) If relevant, consider translating estimates of relative risk into absolute risk for a meaningful time period                                                                                             |       |
| Other analyses           | 17 | Report other analyses done—eg analyses of subgroups and interactions, and sensitivity analyses                                                                                                               | 12-14 |
| <b>Discussion</b>        |    |                                                                                                                                                                                                              |       |
| Key results              | 18 | Summarise key results with reference to study objectives                                                                                                                                                     | 14-15 |
| Limitations              | 19 | Discuss limitations of the study, taking into account sources of potential bias or imprecision. Discuss both direction and magnitude of any potential bias                                                   | 18    |
| Interpretation           | 20 | Give a cautious overall interpretation of results considering objectives, limitations, multiplicity of analyses, results from similar studies, and other relevant evidence                                   | 14-18 |
| Generalisability         | 21 | Discuss the generalisability (external validity) of the study results                                                                                                                                        | 18    |
| <b>Other information</b> |    |                                                                                                                                                                                                              |       |
| Funding                  | 22 | Give the source of funding and the role of the funders for the present study and, if applicable, for the original study on which the present article is based                                                | 1     |

\*Give information separately for cases and controls in case-control studies and, if applicable, for exposed and unexposed groups in cohort and cross-sectional studies.

**Note:** An Explanation and Elaboration article discusses each checklist item and gives methodological background and published examples of transparent reporting. The STROBE checklist is best used in conjunction with this article (freely available on the Web sites of PLoS Medicine at <http://www.plosmedicine.org/>, Annals of Internal Medicine at <http://www.annals.org/>, and Epidemiology at <http://www.epidem.com/>). Information on the STROBE Initiative is available at [www.strobe-statement.org](http://www.strobe-statement.org)

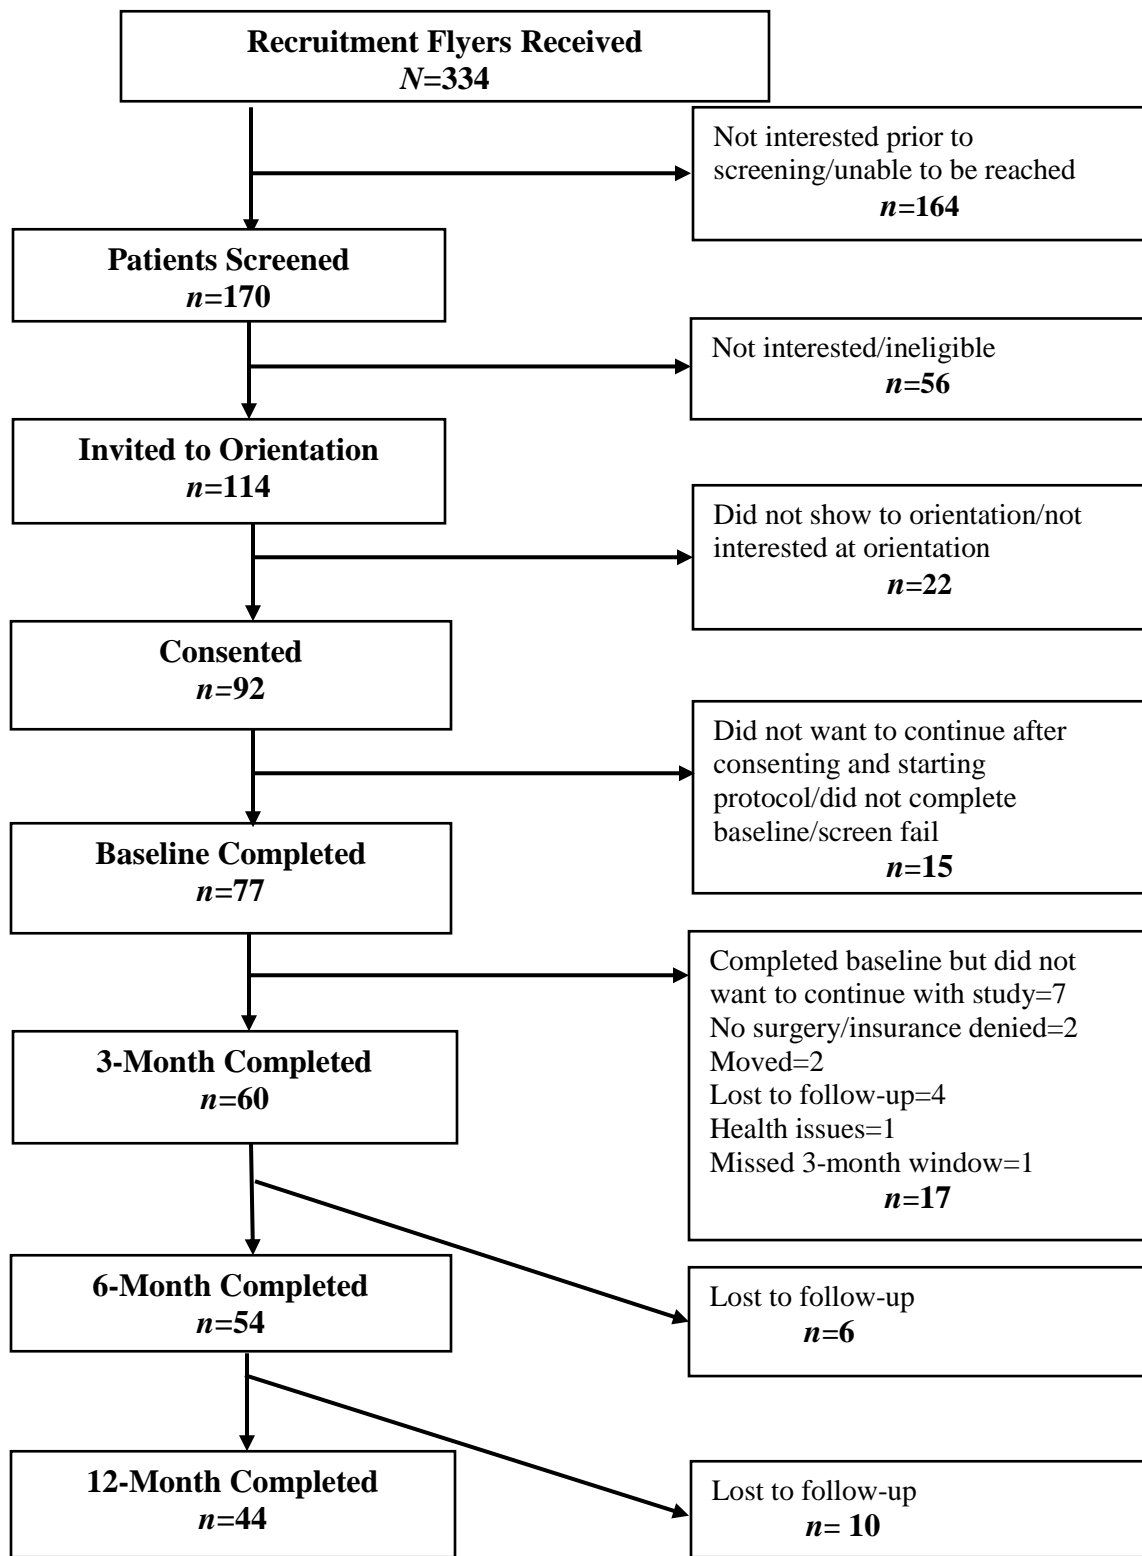

**Supplemental Figure 1: Flow Chart**

**Supplemental Table 2.** Accelerometer data (LPA, MVPA, sedentary time) according to the 4 time of assessments and seasons

|                                             | <b>Before MBS</b><br>N = 826 mean (SD) | <b>3 months after MBS</b><br>N=683 mean (SD) | <b>6 months after MBS</b><br>N=603 mean (SD) | <b>12 months after MBS</b><br>N=465 mean (SD) | <b>p.overall</b> |
|---------------------------------------------|----------------------------------------|----------------------------------------------|----------------------------------------------|-----------------------------------------------|------------------|
| <b>Body mass index</b> (kg.m <sup>2</sup> ) | 45.9 (7.55)                            | 42.5 (9.03)                                  | 35.0 (6.00)                                  | 33.4 (6.02)                                   | <0.001           |
| <b>LPA</b> (min/d)                          | 343 (104)                              | 330 (121)                                    | 353 (110)                                    | 346 (113)                                     | 0.003            |
| <b>MVPA</b> (min/d)                         | 37.7 (31.4)                            | 42.2 (45.5)                                  | 44.1 (41.3)                                  | 43.3 (54.8)                                   | 0.020            |
| <b>Sedentary time</b> (min/d)               | 640 (189)                              | 627 (176)                                    | 604 (178)                                    | 587 (156)                                     | <0.001           |
| <b>Seasons</b>                              | <b>N %</b>                             | <b>N %</b>                                   | <b>N %</b>                                   | <b>N %</b>                                    | <0.001           |
| Autumn                                      | 192 (23.2%)                            | 177 (25.9%)                                  | 163 (27.0%)                                  | 156 (33.5%)                                   |                  |
| Spring                                      | 227 (27.5%)                            | 146 (21.4%)                                  | 142 (23.5%)                                  | 120 (25.8%)                                   |                  |
| Summer                                      | 221 (26.8%)                            | 243 (35.6%)                                  | 125 (20.7%)                                  | 80 (17.2%)                                    |                  |
| Winter                                      | 186 (22.5%)                            | 117 (17.1%)                                  | 173 (28.7%)                                  | 109 (23.4%)                                   |                  |
|                                             | <b>Spring N=688</b><br>N %             | <b>Summer N=635</b><br>N %                   | <b>Fall N=669</b><br>N %                     | <b>Winter N=585</b><br>N %                    | <b>p.overall</b> |
| <b>LPA</b> (min/d)                          | 353 (107)                              | 331 (124)                                    | 349 (110)                                    | 337 (104)                                     | 0.001            |
| <b>MVPA</b> (min/d)                         | 45.3 (49.9)                            | 41.3 (41.6)                                  | 37.2 (31.0)                                  | 41.6 (45.1)                                   | 0.006            |
| <b>Sedentary time</b> (min/d)               | 601 (180)                              | 620 (170)                                    | 625 (178)                                    | 630 (183)                                     | 0.016            |

N = number of observations; LPA = light intensity physical activity; MVPA = moderate-to-vigorous intensity physical activity.

**Supplemental Table 3.** Associations of weather conditions and air pollution with MVPA

| Models: Associations with MVPA                   | Averages temperature (°C)<br>β [95%CI] | Maximal temperature (°C)<br>β [95%CI] | WBGT (°F)<br>β [95%CI]      | Air Quality Index<br>β [95%CI] |
|--------------------------------------------------|----------------------------------------|---------------------------------------|-----------------------------|--------------------------------|
| Number of days                                   | -0.02 [-0.02, -0.02] ***               | -0.02 [-0.02, -0.02] ***              | -0.02 [-0.02, -0.02] ***    | -0.02 [-0.02, -0.02] ***       |
| Weekends                                         | -0.07 [-0.08, -0.06] ***               | -0.07 [-0.09, -0.06] ***              | -0.07 [-0.09, -0.06] ***    | -0.07 [-0.09, -0.06] ***       |
| Season: spring                                   | 0.09 [-0.007, 0.2] +                   | 0.1 [0.03, 0.2] **                    | 0.1 [0.008, 0.2] *          | 0.1 [0.03, 0.2] **             |
| Season: summer                                   | 0.007 [-0.1, 0.1]                      | 0.03 [-0.09, 0.1]                     | 0.01 [-0.1, 0.1]            | -0.002 [-0.1, 0.1]             |
| Season: winter                                   | -0.07 [-0.1, -0.0003] *                | -0.06 [-0.1, 0.01]                    | -0.1 [-0.2, -0.06] ***      | -0.05 [-0.1, 0.02]             |
| Sex: Males                                       | -0.5 [-0.8, -0.2] ***                  | -0.5 [-0.8, -0.2] ***                 | -0.5 [-0.8, -0.2] ***       | -0.5 [-0.8, -0.2] ***          |
| Body mass index (kg.m <sup>2</sup> )             | -0.01 [-0.02, -0.0009] *               | -0.01 [-0.02, -0.001] *               | -0.01 [-0.02, -0.001] *     | -0.01 [-0.02, -0.0008] *       |
| Age                                              | -0.01 [-0.02, -0.005] **               | -0.01 [-0.02, -0.006] **              | -0.01 [-0.02, -0.006] **    | -0.01 [-0.02, -0.006] ***      |
| lag_MVPA (min)                                   | -0.00005 [-0.0002, 0.0001]             | 0.000008 [-0.0001, 0.0002]            | 0.00002 [-0.0001, 0.0002]   | -0.000005 [-0.0002, 0.0001]    |
| s (Snow (cm))                                    | ***                                    | ***                                   | ***                         | ***                            |
| s (Rain precipitation (cm))                      | ***                                    | ***                                   | ***                         | ***                            |
| lag_ Averaged temperature (Celsius)              | -0.002 [-0.004, 0.0003] +              |                                       |                             |                                |
| <b><u>s (Averaged temperature (Celsius))</u></b> | ***                                    |                                       |                             |                                |
| lag_(Maximal Temperature (Celsius))              |                                        | 0.001 [-0.0004, 0.003]                |                             |                                |
| <b><u>s (Maximal Temperature (Celsius))</u></b>  |                                        | ***                                   |                             |                                |
| lag_WBGT_min                                     |                                        |                                       | -0.002 [-0.003, -0.0006] ** |                                |

**Supplemental Table 3.** Associations of weather conditions and air pollution with MVPA

| <u>s WBG</u>                 |              |              | ***          |                           |
|------------------------------|--------------|--------------|--------------|---------------------------|
| lag_ Air Quality Index       |              |              |              | -0.0001 [-0.0006, 0.0004] |
| <u>s (Air Quality Index)</u> |              |              |              | ***                       |
| N (observation number)       | 2252         | 2252         | 2214         | 2252                      |
| R <sup>2</sup>               | <b>0.642</b> | <b>0.643</b> | <b>0.630</b> | <b>0.638</b>              |
| AIC                          | 31842.5      | 31822.8      | 31381.2      | 31994.1                   |

\* = ≤.05; \*\* = ≤.01; \*\*\* = ≤.001; MVPA = moderate-to-vigorous intensity physical activity; s = smoothed; WBG = Wet Bulb Globe Temperature.

**Supplemental Table 4.** Associations of weather conditions and air pollution with light intensity physical activity

| Models: Associations with LPA                    | Averages temperature (°C)<br>β [95%CI] | Maximal temperature (°C)<br>β [95%CI] | WBGT (°F)<br>β [95%CI]   | Air Quality Index<br>β [95%CI] |
|--------------------------------------------------|----------------------------------------|---------------------------------------|--------------------------|--------------------------------|
| Number of days                                   | -4.5 [-5.6, -3.3] ***                  | -4.5 [-5.6, -3.3] ***                 | -4.4 [-5.6, -3.3] ***    | -4.4 [-5.5, -3.3] ***          |
| Weekends                                         | -28.4 [-36.2, -20.6] ***               | -28.3 [-36.0, -20.5] ***              | -27.8 [-35.7, -20.0] *** | -28.8 [-36.6, -21.1] ***       |
| Season: spring                                   | -9.3 [-31.5, 12.8]                     | -8.8 [-30.9, 13.4]                    | -10.0 [-32.3, 12.4]      | -11.7 [-33.5, 10.1]            |
| Season: summer                                   | -2.4 [-26.0, 21.2]                     | -3.6 [-26.6, 19.4]                    | -3.3 [-26.5, 19.9]       | -2.1 [-23.9, 19.7]             |
| Season: winter                                   | -5.7 [-29.4, 18.1]                     | -6.9 [-30.2, 16.3]                    | -7.5 [-31.4, 16.4]       | -12.4 [-34.3, 9.4]             |
| Sex: Males                                       | -40.1 [-64.8, -15.4] **                | -39.8 [-64.5, -15.1] **               | -40.5 [-65.3, -15.8] **  | -40.5 [-65.4, -15.7] **        |
| Body mass index (kg.m <sup>2</sup> )             | -1.0 [-1.9, -0.05] *                   | -1.0 [-1.9, -0.05] *                  | -1.0 [-1.9, -0.07] *     | -0.8 [-1.8, 0.1] +             |
| Age                                              | 0.1 [-0.6, 0.8]                        | 0.1 [-0.6, 0.8]                       | 0.08 [-0.7, 0.8]         | 0.1 [-0.6, 0.9]                |
| lag_LPA (min)                                    | 0.2 [0.1, 0.2] ***                     | 0.2 [0.1, 0.2] ***                    | 0.2 [0.1, 0.2] ***       | 0.2 [0.1, 0.2] ***             |
| s (Snow (cm))                                    | *                                      | *                                     | *                        |                                |
| s (Rain precipitation (cm))                      | NS                                     | NS                                    | NS                       |                                |
| Rain precipitation (cm)                          |                                        |                                       |                          | -9.4 [-21.3, 2.6]              |
| Snow (cm)                                        |                                        |                                       |                          | -5.8 [-10.5, -1.1] *           |
| lag_ Averaged temperature (Celsius)              | -0.1 [-1.2, 0.9]                       |                                       |                          |                                |
| <b><u>s (Averaged temperature (Celsius))</u></b> | <b>NS</b>                              |                                       |                          |                                |
| lag_(Maximal Temperature (Celsius))              |                                        | 0.04 [-0.8, 0.8]                      |                          |                                |



**Supplemental Table 4.** Associations of weather conditions and air pollution with light intensity physical activity

|                                                 |         |         |                  |                   |
|-------------------------------------------------|---------|---------|------------------|-------------------|
| <b><u>s (Maximal Temperature (Celsius))</u></b> |         | NS      |                  |                   |
| lag_WBGT_min                                    |         |         | 00.2 [-0.4, 0.8] |                   |
| <b><u>s WBGT</u></b>                            |         |         | NS               |                   |
| lag_Air Quality Index                           |         |         |                  | 0.07 [-0.2, 0.3]  |
| <b><u>Air Quality Index</u></b>                 |         |         |                  | -0.2 [-0.5, 0.04] |
| N (observation number)                          | 2261    | 2261    | 2223             | 2261              |
| R <sup>2</sup>                                  | 0.424   | 0.424   | 0.422            | 0.136             |
| AIC                                             | 26708.3 | 26705.6 | 26272.9          | 26851.5           |

\* =  $\leq 0.05$ ; \*\* =  $\leq 0.01$ ; \*\*\* =  $\leq 0.001$ ; LPA = light intensity physical activity; s = smoothed; WBGT = Wet Bulb Globe Temperature.

**Supplemental Table 5.** Associations of weather conditions and air pollution with sedentary time

| Models: Associations with sedentary time         | Averages temperature (°C)<br>β [95%CI] | Maximal temperature (°C)<br>β [95%CI] | WBGT (°F)<br>β [95%CI] | Air Quality Index<br>β [95%CI] |
|--------------------------------------------------|----------------------------------------|---------------------------------------|------------------------|--------------------------------|
| Number of days                                   | -0.8 [-2.6, 1.0]                       | -0.8 [-2.6, 1.0]                      | -0.9 [-2.7, 1.0]       | -0.8 [-2.7, 1.0]               |
| Weekends                                         | -14.4 [-27.0, -1.8] *                  | -14.2 [-26.7, -1.6] *                 | -16.1 [-28.8, -3.4] *  | -13.5 [-26.0, -1.0] *          |
| Season: spring                                   | 9.1 [-26.8, 45.1]                      | 9.0 [-26.9, 44.8]                     | 11.0 [-25.3, 47.3]     | 12.0 [-23.4, 47.5]             |
| Season: summer                                   | 13.8 [-23.9, 51.4]                     | 11.4 [-25.6, 48.4]                    | 15.6 [-21.7, 52.9]     | 15.7 [-19.6, 51.0]             |
| Season: winter                                   | 8.7 [-29.5, 46.8]                      | 9.7 [-27.7, 47.2]                     | 12.9 [-25.6, 51.4]     | 13.3 [-22.1, 48.7]             |
| Sex: Males                                       | 31.6 [-8.3, 71.4]                      | 31.3 [-8.4, 71.1]                     | 30.7 [-9.4, 70.7]      | 30.8 [-9.0, 70.6]              |
| Body mass index (kg.m <sup>2</sup> )             | 3.4 [1.9, 4.9] ***                     | 3.4 [1.9, 4.9] ***                    | 3.5 [1.9, 5.0] ***     | 3.4 [1.9, 4.9] ***             |
| Age                                              | 2.6 [1.4, 3.8] ***                     | 2.6 [1.4, 3.8] ***                    | 2.5 [1.4, 3.7] ***     | 2.6 [1.4, 3.8] ***             |
| lag_sedantary time (min)                         | 0.09 [0.05, 0.1] ***                   | 0.09 [0.05, 0.1] ***                  | 0.09 [0.05, 0.1] ***   | 0.09 [0.05, 0.1] ***           |
| s (Snow (cm))                                    | *                                      | *                                     | *                      | *                              |
| s (Rain precipitation (cm))                      | NS                                     | NS                                    | NS                     | NS                             |
| lag_ Averaged temperature (Celsius)              | -0.7 [-2.4, 1.0]                       |                                       |                        |                                |
| <b><u>s (Averaged temperature (Celsius))</u></b> | <b>NS</b>                              |                                       |                        |                                |
| lag_(Maximal Temperature (Celsius))              |                                        | -0.7 [-2.0, 0.6]                      |                        |                                |
| <b><u>s (Maximal Temperature (Celsius))</u></b>  |                                        | <b>NS</b>                             |                        |                                |
| lag_WBGT_min                                     |                                        |                                       | -0.4 [-1.3, 0.6]       |                                |

**Supplemental Table 5.** Associations of weather conditions and air pollution with sedentary time

| <u>s</u> WBGT                |         |         |         | NS                 |
|------------------------------|---------|---------|---------|--------------------|
| lag_ Air Quality Index       |         |         |         | -0.4 [-0.8, 0.001] |
| <u>s</u> (Air Quality Index) |         |         |         | NS                 |
| N (observation number)       | 2252    | 2252    | 2214    | 2252               |
| R <sup>2</sup>               | 0.393   | 0.394   | 0.394   | 0.394              |
| AIC                          | 28758.2 | 28757.0 | 28278.6 | 28752.3            |

\* = ≤.05; \*\* = ≤.01; \*\*\* = ≤.001; MVPA = moderate-to-vigorous intensity physical activity; s = smoothed; WBGT = Wet Bulb Globe Temperature.

**Supplemental Table 6.** R results for the sensitivity analysis for associations of weather conditions and air pollution with moderate-to-vigorous intensity physical activity before and after metabolic and bariatric surgery

| Models: Associations with MVPA                                  | Averages temperature (°C)<br>β [95%CI] | Maximal temperature (°C)<br>β [95%CI] | WBGT (°F)<br>β [95%CI]     | Air Quality Index<br>β [95%CI] |
|-----------------------------------------------------------------|----------------------------------------|---------------------------------------|----------------------------|--------------------------------|
| Number of days                                                  | -0.02 [-0.02, -0.02] ***               | -0.02 [-0.02, -0.02] ***              | -0.02 [-0.02, -0.02] ***   | -0.02 [-0.02, -0.02] ***       |
| Weekends                                                        | -0.07 [-0.09, -0.06] ***               | -0.07 [-0.09, -0.06] ***              | -0.07 [-0.09, -0.06] ***   | -0.07 [-0.08, -0.05] ***       |
| Season: spring                                                  | 0.1 [0.02, 0.2] *                      | 0.1 [0.04, 0.2] **                    | 0.1 [0.02, 0.2] *          | 0.1 [0.05, 0.2] **             |
| Season: summer                                                  | 0.03 [-0.09, 0.2]                      | 0.04 [-0.08, 0.2]                     | 0.01 [-0.1, 0.1]           | 0.006 [-0.1, 0.1]              |
| Season: winter                                                  | -0.08 [-0.2, -0.01] *                  | -0.07 [-0.1, 0.003] +                 | -0.2 [-0.2, -0.08] ***     | -0.05 [-0.1, 0.02]             |
| Sex: Males                                                      | -0.5 [-0.8, -0.2] ***                  | -0.5 [-0.8, -0.2] ***                 | -0.5 [-0.8, -0.2] ***      | -0.5 [-0.8, -0.2] ***          |
| Body mass index (kg.m <sup>2</sup> )                            | -0.01 [-0.02, -0.0008] *               | -0.01 [-0.02, -0.0007] *              | -0.01 [-0.02, -0.001] *    | -0.01 [-0.02, -0.0006] *       |
| Age                                                             | -0.01 [-0.02, -0.005] **               | -0.01 [-0.02, -0.006] **              | -0.01 [-0.02, -0.006] **   | -0.01 [-0.02, -0.006] **       |
| lag_MVPA (min)                                                  | -0.00006 [-0.0002, 0.00008]            | -0.00001 [-0.0002, 0.0001]            | -0.00004 [-0.0002, 0.0001] | 0.000003 [-0.0001, 0.0001]     |
| s (Snow (cm))                                                   | ***                                    | ***                                   | ***                        | ***                            |
| s (Rain precipitation (cm))                                     | ***                                    | ***                                   | ***                        | ***                            |
| lag_ Averaged temperature (Celsius)                             | -0.003 [-0.005, -0.001] **             |                                       |                            |                                |
| <b><u>s (Averaged temperature (Celsius)) before surgery</u></b> | ***                                    |                                       |                            |                                |
| <b><u>s (Averaged temperature (Celsius)) after surgery</u></b>  | ***                                    |                                       |                            |                                |
| lag_ (Maximal Temperature (Celsius))                            |                                        | 0.001 [-0.0004, 0.003]                |                            |                                |

**Supplemental Table 6.** R results for the sensitivity analysis for associations of weather conditions and air pollution with moderate-to-vigorous intensity physical activity before and after metabolic and bariatric surgery

|                                                         |         |         |                              |                           |
|---------------------------------------------------------|---------|---------|------------------------------|---------------------------|
| <u>s (Maximal Temperature (Celsius)) before surgery</u> |         | ***     |                              |                           |
| <u>s (Maximal Temperature (Celsius)) after surgery</u>  |         | ***     |                              |                           |
| lag_WBGT_min                                            |         |         | -0.002 [-0.003, -0.0009] *** |                           |
| <u>s WBGT before surgery</u>                            |         |         | ***                          |                           |
| <u>s WBGT after surgery</u>                             |         |         | ***                          |                           |
| lag_Air Quality Index                                   |         |         |                              | -0.0003 [-0.0008, 0.0002] |
| <u>s (Air Quality Index) before surgery</u>             |         |         |                              | ***                       |
| <u>s (Air Quality Index) after surgery</u>              |         |         |                              | ***                       |
| N (observation number)                                  | 2252    | 2252    | 2214                         | 2252                      |
| R <sup>2</sup>                                          | 0.649   | 0.647   | 0.638                        | 0.639                     |
| AIC                                                     | 31542.0 | 31641.6 | 31095.9                      | 31915.3                   |

\* = ≤.05; \*\* = ≤.01; \*\*\* = ≤.001; MVPA = moderate-to-vigorous intensity physical activity; s = smoothed; WBGT = Wet Bulb Globe Temperature.

**Supplemental Table 7.** R results for the sensitivity analysis for associations of weather conditions and air pollution with light intensity physical activity before and after metabolic and bariatric surgery

| Models: Associations with LPA                                  | Averages temperature (°C)<br>β [95%CI] | Maximal temperature (°C)<br>β [95%CI] | WBGT (°F)<br>β [95%CI]   | Air Quality Index before surgery<br>β [95%CI] | Air Quality Index after surgery<br>β [95%CI] |
|----------------------------------------------------------------|----------------------------------------|---------------------------------------|--------------------------|-----------------------------------------------|----------------------------------------------|
| Number of days                                                 | -4.5 [-5.6, -3.4] ***                  | -4.5 [-5.6, -3.4] ***                 | -4.5 [-5.6, -3.4] ***    | -2.2 [-4.1, -0.4] *                           | -5.5 [-6.9, -4.1] ***                        |
| Weekends                                                       | -28.0 [-35.8, -20.3] ***               | -28.0 [-35.7, -20.2] ***              | -27.7 [-35.6, -19.8] *** | -30.9 [-44.2, -17.6] ***                      | -28.4 [-37.9, -18.9] ***                     |
| Season: spring                                                 | -10.2 [-32.5, 12.1]                    | -9.7 [-32.0, 12.6]                    | -10.5 [-32.8, 11.8]      | -7.5 [-43.3, 28.4]                            | -21.3 [-49.2, 6.6]                           |
| Season: summer                                                 | -3.5 [-27.0, 20.1]                     | -4.6 [-27.6, 18.4]                    | -4.0 [-27.0, 19.1]       | -10.2 [-49.1, 28.8]                           | -2.7 [-29.5, 24.1]                           |
| Season: winter                                                 | -6.7 [-30.5, 17.0]                     | -7.0 [-30.2, 16.3]                    | -8.2 [-32.0, 15.6]       | -21.4 [-59.0, 16.1]                           | -11.7 [-39.1, 15.8]                          |
| Sex: Males                                                     | -39.8 [-64.7, -14.9] **                | -40.2 [-65.1, -15.4] **               | -39.4 [-64.2, -14.7] **  | -57.8 [-102.4, -13.2] *                       | -36.8 [-67.5, -6.1] *                        |
| Body mass index (kg.m <sup>2</sup> )                           | -1.0 [-1.9, -0.05] *                   | -1.0 [-1.9, -0.03] *                  | -1.0 [-1.9, -0.07] *     | -1.5 [-3.4, 0.4]                              | -0.8 [-2.1, 0.5]                             |
| Age                                                            | 0.1 [-0.6, 0.9]                        | 0.1 [-0.6, 0.9]                       | 0.1 [-0.6, 0.8]          | 0.03 [-1.3, 1.3]                              | 0.3 [-0.6, 1.2]                              |
| lag_LPA (min)                                                  | 0.2 [0.1, 0.2] ***                     | 0.2 [0.1, 0.2] ***                    | 0.2 [0.1, 0.2] ***       | 0.2 [0.08, 0.2] ***                           | 0.2 [0.1, 0.2] ***                           |
| s (Snow (cm))                                                  | *                                      | *                                     | *                        |                                               |                                              |
| s (Rain precipitation (cm))                                    | ***                                    | ***                                   | ***                      |                                               |                                              |
| Rain precipitation (cm)                                        |                                        |                                       |                          | -5.1 [-25.5, 15.3]                            | -10.7 [-25.6, 4.1]                           |
| Snow (cm)                                                      |                                        |                                       |                          | -6.1 [-13.5, 1.4]                             | -6.0 [-12.0, -0.04] *                        |
| lag_ Averaged temperature (Celsius)                            | -0.2 [-1.2, 0.9]                       |                                       |                          |                                               |                                              |
| <b><u>s (Averaged temperature (Celsius) before surgery</u></b> | NS                                     |                                       |                          |                                               |                                              |

**Supplemental Table 7.** R results for the sensitivity analysis for associations of weather conditions and air pollution with light intensity physical activity before and after metabolic and bariatric surgery

|                                                                |         |                  |                 |                  |                   |
|----------------------------------------------------------------|---------|------------------|-----------------|------------------|-------------------|
| <b><u>s (Averaged temperature (Celsius)) after surgery</u></b> | NS      |                  |                 |                  |                   |
| lag_ (Maximal Temperature (Celsius))                           |         | 0.05 [-0.8, 0.8] |                 |                  |                   |
| <b><u>s (Maximal Temperature (Celsius)) before surgery</u></b> |         | NS               |                 |                  |                   |
| <b><u>s (Maximal Temperature (Celsius)) after surgery</u></b>  |         | NS               |                 |                  |                   |
| lag_ WBGT_min                                                  |         |                  | 0.2 [-0.4, 0.8] |                  |                   |
| <b><u>s WBGT before surgery</u></b>                            |         |                  | NS              |                  |                   |
| <b><u>s WBGT after surgery</u></b>                             |         |                  | NS              |                  |                   |
| lag_ Air Quality Index                                         |         |                  |                 | 0.2 [-0.2, 0.6]  | -0.03 [-0.4, 0.3] |
| <b><u>Air Quality Index</u></b>                                |         |                  |                 | -0.3 [-0.7, 0.1] | -0.1 [-0.5, 0.2]  |
| N (observation number)                                         | 2261    | 2223             | 2261            | 717              | 1544              |
| R <sup>2</sup>                                                 | 0.426   | 0.421            | 0.425           | 0.147            | 0.143             |
| AIC                                                            | 26706.1 | 26275.7          | 26705.3         | 8425.1           | 18385.5           |

\* = ≤.05; \*\* = ≤.01; \*\*\* = ≤.001; LPA = light intensity physical activity; s = smoothed; WBGT = Wet Bulb Globe Temperature.

**Supplemental Table 8.** R results for the sensitivity analysis for associations of weather conditions and air pollution with sedentary time before and after metabolic and bariatric surgery

| Models: Associations with sedentary time                        | Averages temperature (°C)<br>β [95%CI] | Maximal temperature (°C)<br>β [95%CI] | WBGT (°F)<br>β [95%CI] | Air Quality Index<br>β [95%CI] |
|-----------------------------------------------------------------|----------------------------------------|---------------------------------------|------------------------|--------------------------------|
| Number of days                                                  | -0.8 [-2.6, 1.0]                       | -0.8 [-2.6, 1.0]                      | -0.8 [-2.7, 1.0]       | -0.8 [-2.6, 1.0]               |
| Weekends                                                        | -14.6 [-27.2, -2.0] *                  | -14.3 [-26.9, -1.8] *                 | -16.4 [-29.1, -3.7] *  | -13.0 [-25.5, -0.5] *          |
| Season: spring                                                  | 9.9 [-26.1, 45.8]                      | 10.0 [-25.9, 45.8]                    | 11.7 [-24.7, 48.0]     | 12.5 [-23.0, 48.0]             |
| Season: summer                                                  | 15.0 [-22.3, 52.3]                     | 12.9 [-23.9, 49.6]                    | 14.7 [-22.4, 51.8]     | 15.2 [-20.1, 50.5]             |
| Season: winter                                                  | 8.2 [-29.9, 46.2]                      | 9.6 [-27.8, 46.9]                     | 12.4 [-26.1, 50.8]     | 12.5 [-23.0, 47.9]             |
| Sex: Males                                                      | 31.7 [-8.2, 71.6]                      | 32.3 [-7.5, 72.1]                     | 30.5 [-9.6, 70.5]      | 31.4 [-8.4, 71.3]              |
| Body mass index (kg.m <sup>2</sup> )                            | 3.5 [2.0, 5.0] ***                     | 3.5 [1.9, 5.0] ***                    | 3.5 [2.0, 5.0] ***     | 3.4 [1.9, 5.0] ***             |
| Age                                                             | 2.5 [1.3, 3.7] ***                     | 2.5 [1.4, 3.7] ***                    | 2.5 [1.3, 3.7] ***     | 2.6 [1.4, 3.8] ***             |
| lag_sedantary time (min)                                        | 0.09 [0.05, 0.1] ***                   | 0.09 [0.05, 0.1] ***                  | 0.09 [0.05, 0.1] ***   | 0.09 [0.05, 0.1] ***           |
| s (Snow (cm))                                                   | *                                      | *                                     | *                      | *                              |
| s (Rain precipitation (cm))                                     | NS                                     | NS                                    | NS                     | NS                             |
| lag_ Averaged temperature (Celsius)                             | -0.7 [-2.4, 1.0]                       |                                       |                        |                                |
| <b><u>s (Averaged temperature (Celsius)) before surgery</u></b> | NS                                     |                                       |                        |                                |
| <b><u>s (Averaged temperature (Celsius)) after surgery</u></b>  | NS                                     |                                       |                        |                                |
| lag_ (Maximal Temperature (Celsius))                            |                                        | -0.7 [-2.0, 0.6]                      |                        |                                |



**Supplemental Table 8.** R results for the sensitivity analysis for associations of weather conditions and air pollution with sedentary time before and after metabolic and bariatric surgery

|                                                         |         |         |                  |                   |
|---------------------------------------------------------|---------|---------|------------------|-------------------|
| <u>s (Maximal Temperature (Celsius)) before surgery</u> |         | NS      |                  |                   |
| <u>s (Maximal Temperature (Celsius)) after surgery</u>  |         | NS      |                  |                   |
| lag_ WBGT_min                                           |         |         | -0.4 [-1.3, 0.6] |                   |
| <u>s WBGT before surgery</u>                            |         |         | NS               |                   |
| <u>s WBGT after surgery</u>                             |         |         | NS               |                   |
| lag_ Air Quality Index                                  |         |         |                  | -0.4 [-0.8, 0.02] |
| <u>s (Air Quality Index) before surgery</u>             |         |         |                  | *                 |
| <u>s (Air Quality Index) after surgery</u>              |         |         |                  | NS                |
| N (observation number)                                  | 2252    | 2214    | 2252             | 2252              |
| R <sup>2</sup>                                          | 0.394   | 0.395   | 0.394            | 0.395             |
| AIC                                                     | 28756.7 | 28273.2 | 28756.2          | 28750.9           |

\* = ≤.05; \*\* = ≤.01; \*\*\* = ≤.001; MVPA = moderate-to-vigorous intensity physical activity; s = smoothed; WBGT = Wet Bulb Globe Temperature.
